# Supplementary material
Source: PubMed Central journal article supplement (PMC5899481)
Supplement: pnas.201722493SI.pdf [file pnas.201722493SI.pdf]

# Supporting Information

Marshall et al. 10.1073/pnas.1722493115

**Table S1. Detailed CMS procedure**

| CMS start     | Day 1                                     | Day 2                                         | Day 3                                         | Day 4                                           | Day 5                                     | Day 6                                   | Day 7                                   |
|---------------|-------------------------------------------|-----------------------------------------------|-----------------------------------------------|-------------------------------------------------|-------------------------------------------|-----------------------------------------|-----------------------------------------|
| <b>Week 1</b> |                                           |                                               |                                               |                                                 |                                           |                                         |                                         |
| 8 am          | Confinement for 60 min in a 4 × 5 cm tube | Confinement for 60 min in a 4 × 5 cm tube     | Food restriction (50 mg of food pellets ×3 h) | Confinement for 60 min in a 4 × 5 cm tube       | Confinement for 60 min in a 4 × 5 cm tube | Access to an empty bottle (2 h)         | Inversion of the light/dark cycle       |
| 1 pm          | Forced bath in water at 32 °C for 30 min  | Confinement for 60 min in a 4 × 5 cm tube     | Confinement for 60 min in a 4 × 5 cm tube     | Paired housing in damp sawdust for 10 min       | Total darkness for 2 h                    | Housing in mildly damp sawdust for 24 h |                                         |
| 5 pm          |                                           | Water and food deprivation for 15 h           |                                               |                                                 | Water deprivation for 15 h                |                                         |                                         |
| <b>Week 2</b> |                                           |                                               |                                               |                                                 |                                           |                                         |                                         |
| 8 am          | Confinement for 60 min in a 4 × 5 cm tube | Confinement for 60 min in a 4 × 5 cm tube     | Confinement for 60 min in a 4 × 5 cm tube     | Paired housing with food restriction for 10 min | Inversion of the light/dark cycle         | Inversion of the light/dark cycle       | Inversion of the light/dark cycle       |
| 1 pm          | Forced bath in water at 32 °C for 30 min  | Paired housing in damp sawdust for 18 h       | Confinement for 60 min in a 4 × 5 cm tube     | Inversion of the light/dark cycle               |                                           |                                         | Housing in mildly damp sawdust for 19 h |
| 5 pm          |                                           |                                               | Water and food deprivation for 15 h           |                                                 |                                           |                                         |                                         |
| <b>Week 3</b> |                                           |                                               |                                               |                                                 |                                           |                                         |                                         |
| 8 am          | Confinement for 60 min in a 4 × 5 cm tube | Food restriction (50 mg of food pellets ×3 h) | Paired housing in damp sawdust (10 min)       | Forced bath in water at 32 °C (30 min)          | Access to an empty bottle (2 h)           |                                         | Inversion of the light/dark cycle       |
| 1 pm          | Confinement for 60 min in a 4 × 5 cm tube | Confinement for 60 min in a 4 × 5 cm tube     | Confinement for 60 min in a 4 × 5 cm tube     | Confinement for 60 min in a 4 × 5 cm tube       | Confinement for 60 min in a 4 × 5 cm tube | Inversion of the light/dark cycle       |                                         |
| 5 pm          | Water and food deprivation for 15 h       |                                               |                                               | Water deprivation for 15 h                      | Housing in mildly damp sawdust for 20 h   |                                         |                                         |
